# Supplementary material for: Transcriptomic analysis of elderly women with low muscle mass: association with immune system pathway
Source: publisher site journal article supplement (doi:10.18632/aging.203505), 2021-09-07
Supplement: Supplementary file [file aging-v13i17-203505-supplementary-material-SD1.pdf]

**SUPPLEMENTARY FIGURE**

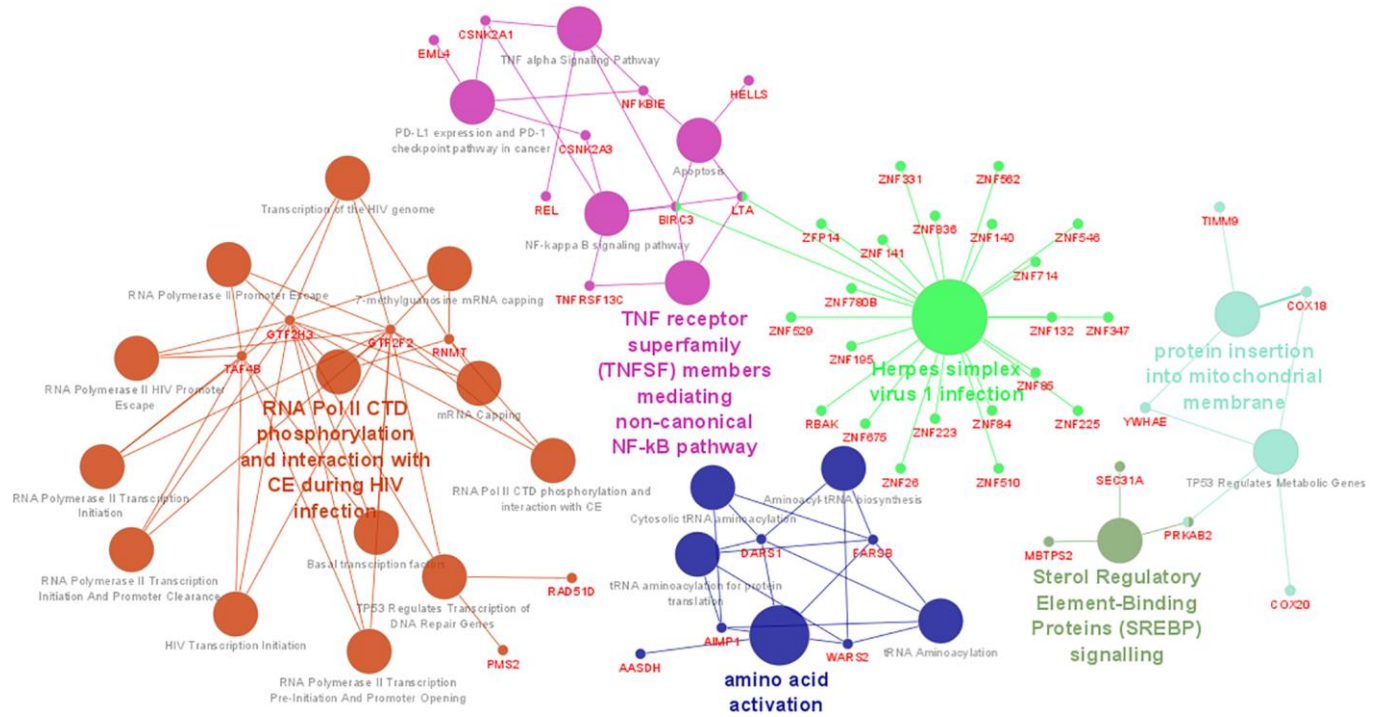

**Supplementary Figure 1. Gene set analysis of genes with negative logistic regression.** GSA terms are interconnected with their associated genes. Related GSA terms are indicated by the same color. Abbreviation: GSA: Gene Set Analysis.
