# Supplementary material for: Transcriptomic analysis of elderly women with low muscle mass: association with immune system pathway
Source: Aging (Albany NY). 2021 Sep 7;13(17):20992–1008. doi: 10.18632/aging.203505 (PMC8457609; doi:10.18632/aging.203505)
Supplement: Supplementary Table 1 [file aging-13-203505-s002.xls]

## Sheet: Supplementary_table_1
Supplementary Table 1. Transcript clusters discriminated by logistic regression.
Transcript_cluster	Genes	beta coefficient	p.value
TC22000070.hg.1	TMEM191A	35.28	0.00413386
TC16001329.hg.1	C16orf95	28.47	0.00175747
TC16000721.hg.1	RHBDF1	26.33	0.00773064
TC15000458.hg.1	FOXB1	25.76	0.0029495
TC01006288.hg.1	CLCNKB	25.69	0.00803298
TC16000503.hg.1	NDRG4	24.95	0.00429821
TC08000606.hg.1	OSR2	24.72	0.00405053
TC05000725.hg.1	SLC4A9	24.27	0.00404994
TC09001193.hg.1	APBA1	23.21	0.00733256
TC19000048.hg.1	IZUMO4	23.17	0.00599094
TC12000952.hg.1	HNF1A	22.87	0.00756432
TC19000576.hg.1	AXL	22.59	0.0038471
TC10001261.hg.1	FRMPD2; FRMPD2B	21.94	0.00823743
TC11002094.hg.1	KLHL35	21.08	0.00294231
TC02002099.hg.1	GPAT2	21.05	0.00558841
TC15001759.hg.1	FSD2	21	0.00313892
TC01000186.hg.1	FHAD1	20.3	0.00592327
TC12002705.hg.1	LINC00940	20.26	0.00426104
TC17000481.hg.1	GRB7	20.22	0.00780038
TC12000684.hg.1	LRRIQ1	20.18	0.00184821
TC11002117.hg.1	GUCY2EP	20.04	0.00580866
TC03001789.hg.1	CPNE4	20.03	0.00749276
TC19000370.hg.1	NCAN	19.95	0.00625207
TC22000208.hg.1	CCDC157	19.75	0.0078262
TC20000229.hg.1	BPIFB1	19.12	0.00885689
TC01003343.hg.1	IQGAP3	19.11	0.00723242
TC15000668.hg.1	TBC1D21	18.91	0.00203605
TC13000840.hg.1	TC13000840.hg.1	18.79	0.00223384
TC07000328.hg.1	EGFR	18.74	0.00917524
TC21000445.hg.1	DSCR4	18.17	0.00447163
TC19002589.hg.1	TC19002589.hg.1	17.91	0.00372178
TC17001918.hg.1	DNAH17	17.67	0.00966113
TC15000229.hg.1	RYR3	17.58	0.00341734
TC01003478.hg.1	LINC01363	17.45	0.00257861
TC01000434.hg.1	KIAA1522	17.43	0.00791546
TC03001858.hg.1	PCOLCE2	17.39	0.00693534
TC07000569.hg.1	ASB4	17.38	0.00344305
TC18000150.hg.1	FHOD3	17.36	0.00883008
TC14001820.hg.1	LINC00521	17.15	0.00465003
TC02000151.hg.1	DRC1	17.14	0.00502701
TC03001369.hg.1	CSPG5	17.12	0.00662108
TC15001683.hg.1	NRG4	16.86	0.00179872
TC16000622.hg.1	CNTNAP4	16.76	0.00576999
TC19001892.hg.1	PEG3; ZIM2	16.69	0.00211962
TC02002200.hg.1	LINC01106; LINC01123	16.53	0.00478977
TC12002964.hg.1	LOC100507377	16.49	0.00426292
TC02003418.hg.1	TC02003418.hg.1	16.45	0.00468792
TC07000144.hg.1	GPNMB	16.31	0.00536016
TC11002020.hg.1	FGF3	16.27	0.00313879
TC06001093.hg.1	IYD	16.09	0.00480093
TC02001156.hg.1	SATB2-AS1	16.08	0.00882489
TC07000127.hg.1	ABCB5	16.02	0.00780086
TC14000579.hg.1	FAM181A	15.79	0.00681896
TC02002857.hg.1	SPATA3-AS1	15.73	0.00744363
TC10000782.hg.1	GSTO2	15.67	0.00929397
TC13000845.hg.1	NALCN	15.38	0.00943264
TC07000732.hg.1	KCND2	15.34	0.00437412
TC11003257.hg.1	GUCY2EP	15.32	0.00671672
TC22000261.hg.1	RASD2	15.18	0.0037897
TC10000670.hg.1	PLCE1	14.9	0.0098593
TC06002512.hg.1	TC06002512.hg.1	14.83	0.00197432
TC10001045.hg.1	CCDC3	14.79	0.00928155
TC03003183.hg.1	IL12A-AS1	14.76	0.00541021
TC05000926.hg.1	LOC728095	14.71	0.00468409
TC06002374.hg.1	MOG	14.68	0.00465244
TC09001409.hg.1	LOC102724684	14.61	0.00308377
TC0X002271.hg.1	TC0X002271.hg.1	14.57	0.00282912
TC20000472.hg.1	PHACTR3	14.56	0.00576218
TC13001725.hg.1	CCDC169	14.48	0.00550346
TC02000380.hg.1	LOC101927533; LOC440867; LOC105369167; AC074391.1	14.33	0.0095575
TC02000577.hg.1	GPAT2	14.21	0.00607029
TC17001633.hg.1	COPZ2	14.21	0.00724693
TC07001179.hg.1	TMEM196	14.17	0.00386742
TC13000685.hg.1	NEK5	14.13	0.00617966
TC02000889.hg.1	THSD7B	14.03	0.00593315
TC02002224.hg.1	PGM5P4-AS1; PGM5P3-AS1	14	0.00862709
TC20000925.hg.1	TC20000925.hg.1	13.98	0.00455811
TC17001838.hg.1	SOX9-AS1	13.95	0.00526755
TC13000364.hg.1	ITGBL1	13.95	0.00796683
TC04001245.hg.1	EPHA5	13.83	0.00631611
TC18000780.hg.1	TC18000780.hg.1	13.63	0.00668858
TC06004001.hg.1	TC06004001.hg.1	13.62	0.00369713
TC11002364.hg.1	CCDC153	13.6	0.00198564
TC01003034.hg.1	TRIM45	13.57	0.00854923
TC04001518.hg.1	TRPC3	13.48	0.00591624
TC03001888.hg.1	TM4SF1	13.48	0.00201031
TC12001841.hg.1	CCDC38	13.47	0.00797969
TC0X000214.hg.1	TC0X000214.hg.1	13.34	0.00663002
TC11001528.hg.1	PAX6	13.27	0.00725721
TC02000191.hg.1	FAM179A	13.12	0.00772288
TC02003282.hg.1	TC02003282.hg.1	12.98	0.00873996
TC0X000659.hg.1	ADGRG4	12.93	0.00653338
TC10000291.hg.1	ANKRD30BP3	12.91	0.00933754
TC15002819.hg.1	PWRN1	12.83	0.00607526
TC01006420.hg.1	TC01006420.hg.1	12.82	0.00878797
TC0X001433.hg.1	SOX3	12.82	0.0066384
TC14000410.hg.1	RDH12	12.78	0.00776903
TC03000224.hg.1	TC03000224.hg.1	12.74	0.00621197
TC02002017.hg.1	REG1B	12.68	0.00504794
TC12001744.hg.1	KCNC2	12.64	0.0068595
TC22000948.hg.1	TC22000948.hg.1	12.61	0.00920939
TC6_cox_hap2000231.hg.1	LY6G6E	12.6	0.0039436
TC08001198.hg.1	EFCAB1	12.59	0.00751924
TC05001700.hg.1	SEMA6A	12.4	0.00908816
TC05001741.hg.1	TC05001741.hg.1	12.38	0.00184739
TC01005010.hg.1	TC01005010.hg.1	12.36	0.00512705
TC10002047.hg.1	ANKRD30BP3	12.35	0.00385349
TC04000857.hg.1	HAND2-AS1	12.35	0.00792299
TC04002395.hg.1	TC04002395.hg.1	12.33	0.00910555
TC19001511.hg.1	FBXO27	12.21	0.00631656
TC12000508.hg.1	SLC39A5	12.2	0.00856641
TC01001555.hg.1	FAM163A	12.17	0.00538655
TC12002129.hg.1	FZD10-AS1	12.12	0.00818434
TC12001681.hg.1	WIF1	11.93	0.00624589
TC02000456.hg.1	DCTN1-AS1	11.89	0.0079034
TC14000574.hg.1	CHGA	11.84	0.00939582
TC06000631.hg.1	MEP1A	11.79	0.0054093
TC02000628.hg.1	SLC9A2	11.72	0.00720417
TC06002489.hg.1	TC06002489.hg.1	11.71	0.00962358
TC20001345.hg.1	TC20001345.hg.1	11.71	0.00964628
TC14001189.hg.1	SIX4	11.67	0.00769951
TC06001870.hg.1	DPPA5	11.66	0.00827634
TC10000309.hg.1	ANXA8L1; ANXA8	11.62	0.00964729
TC14000659.hg.1	MEG8; SNORD112	11.61	0.00722371
TC10002914.hg.1	TC10002914.hg.1	11.5	0.00517038
TC12001161.hg.1	CD163L1	11.44	0.0099214
TC0X000446.hg.1	KLHL4	11.32	0.00432329
TC01003528.hg.1	SLC9C2	11.27	0.00837255
TC03001491.hg.1	ASB14	11.22	0.00668493
TC06000951.hg.1	CLVS2	11.16	0.00584533
TC07002644.hg.1	TMEM139	11.14	0.00653419
TC22001469.hg.1	SYNGR1	11.08	0.00501974
TC09001497.hg.1	FAM225B	11.07	0.00698709
TC11000569.hg.1	SLC22A10	11.03	0.00976656
TC11002393.hg.1	CLMP	11.03	0.00992454
TC12001560.hg.1	HOXC-AS1	11.02	0.00449242
TC09002894.hg.1	GOLM1	10.95	0.00483707
TC02002656.hg.1	SATB2	10.95	0.00935324
TC11000058.hg.1	IGF2-AS	10.89	0.0092586
TC01002718.hg.1	C1orf87	10.86	0.00832923
TC01003042.hg.1	TBX15	10.85	0.00995162
TC10000071.hg.1	TC10000071.hg.1	10.82	0.00270758
TC14001383.hg.1	TC14001383.hg.1	10.81	0.00841022
TC11001790.hg.1	PRG3	10.81	0.00652929
TC01001732.hg.1	C4BPB	10.81	0.00948767
TC14000683.hg.1	TC14000683.hg.1	10.75	0.00559666
TC06004117.hg.1	LY6G6E	10.75	0.00643912
TC05002834.hg.1	CTD-2297D10.2	10.74	0.00255819
TC11001093.hg.1	TC11001093.hg.1	10.74	0.00989093
TC16000629.hg.1	VAT1L	10.73	0.00286234
TC10002937.hg.1	C10orf53	10.6	0.00714161
TC07000842.hg.1	STRA8	10.58	0.00830416
TC14001450.hg.1	TC14001450.hg.1	10.5	0.00337208
TC14001490.hg.1	TC14001490.hg.1	10.49	0.00258603
TC19000914.hg.1	NLRP8	10.43	0.00481104
TC01001427.hg.1	RGS4	10.39	0.00513424
TC04001466.hg.1	CFI	10.36	0.00902581
TC14000825.hg.1	TC14000825.hg.1	10.35	0.00970762
TC06002219.hg.1	RAET1E	10.24	0.00562205
TC13000690.hg.1	TC13000690.hg.1	10.15	0.00602133
TC0Y000083.hg.1	DAZ2; DAZ3; DAZ4	10.13	0.0097678
TC16001775.hg.1	BCAR4	10.12	0.00668679
TC02004479.hg.1	TC02004479.hg.1	10.09	0.00328383
TC19000603.hg.1	TC19000603.hg.1	10.01	0.00287065
TC08000484.hg.1	STAU2-AS1	10	0.00434301
TC02002332.hg.1	CYP4F30P	9.98	0.00915991
TC16001110.hg.1	SALL1	9.96	0.00962663
TC01003369.hg.1	LOC646268	9.95	0.00773265
TC17001894.hg.1	FOXJ1	9.95	0.00668789
TC03003419.hg.1	FAM188B2; CLRN1	9.92	0.00863848
TC03000225.hg.1	CCDC13-AS1	9.92	0.00458994
TC08001008.hg.1	TC08001008.hg.1	9.86	0.00470013
TC15002569.hg.1	TC15002569.hg.1	9.84	0.00473272
TC15000122.hg.1	LINC00929	9.83	0.00759834
TC04000432.hg.1	CXCL13	9.82	0.00592026
TC19002153.hg.1	PINLYP	9.7	0.00860166
TC08001273.hg.1	LOC102724623	9.68	0.00805362
TC21000457.hg.1	TC21000457.hg.1	9.61	0.00735282
TC0X002050.hg.1	TC0X002050.hg.1	9.58	0.00874185
TC15002286.hg.1	TC15002286.hg.1	9.58	0.00242135
TC09002287.hg.1	CRAT	9.55	0.00876936
TC18000430.hg.1	CHST9	9.54	0.00778393
TC22001340.hg.1	LOC101927051	9.53	0.00594521
TC19002019.hg.1	MED26	9.46	0.00476252
TC09000015.hg.1	VLDLR	9.45	0.00428127
TC17002395.hg.1	TC17002395.hg.1	9.42	0.00429961
TC02004729.hg.1	TC02004729.hg.1	9.41	0.00577246
TC02003191.hg.1	TC02003191.hg.1	9.38	0.00670628
TC07001163.hg.1	AGR2	9.38	0.00967039
TC08001567.hg.1	HAS2	9.37	0.00818726
TC05001724.hg.1	TC05001724.hg.1	9.36	0.00865296
TC02002858.hg.1	HTR2B	9.17	0.00192293
TC10002003.hg.1	TC10002003.hg.1	9.16	0.00583599
TC06001566.hg.1	BTNL2	9.16	0.00967387
TC06002700.hg.1	TC06002700.hg.1	9.11	0.00944105
TC10002304.hg.1	TC10002304.hg.1	9.11	0.00169215
TC11002122.hg.1	GDPD4	9.07	0.00996104
TC12002090.hg.1	RILPL1	9.03	0.00726058
TC0X000168.hg.1	LANCL3	9.03	0.00821166
TC22000876.hg.1	TC22000876.hg.1	8.93	0.00899613
TC16000210.hg.1	ITPRIPL2	8.87	0.00512164
TC15001589.hg.1	LOC101929076	8.84	0.00825994
TC11000475.hg.1	OR9Q2	8.84	0.00901854
TC05002304.hg.1	PMCHL1	8.82	0.00404214
TC13000125.hg.1	SERTM1	8.82	0.00928804
TC06003482.hg.1	TC06003482.hg.1	8.81	0.00500714
TC05003041.hg.1	TC05003041.hg.1	8.8	0.00327174
TC14001535.hg.1	TC14001535.hg.1	8.79	0.00396829
TC05002225.hg.1	TC05002225.hg.1	8.78	0.00736585
TC17001955.hg.1	PDE6G	8.75	0.00837603
TC22000486.hg.1	TC22000486.hg.1	8.71	0.00493542
TC02001412.hg.1	LOC101928881	8.66	0.00778199
TC19001669.hg.1	TC19001669.hg.1	8.66	0.00850477
TC22000619.hg.1	TC22000619.hg.1	8.63	0.00711507
TC19002487.hg.1	PCAT19	8.58	0.00694014
TC03002377.hg.1	TC03002377.hg.1	8.57	0.00745924
TC18000515.hg.1	MRO	8.52	0.00631763
TC10000857.hg.1	TC10000857.hg.1	8.47	0.00817585
TC19002333.hg.1	TC19002333.hg.1	8.41	0.00473828
TC07003215.hg.1	OR6W1P	8.4	0.00514732
TC06001757.hg.1	LOC285857	8.36	0.00493951
TC04001479.hg.1	MIR302A; MIR302B; MIR302C; MIR302D; MIR367	8.3	0.00647892
TC03001539.hg.1	LMOD3	8.29	0.00517396
TC01005993.hg.1	TC01005993.hg.1	8.26	0.00156243
TC08001373.hg.1	TC08001373.hg.1	8.24	0.00828526
TC11001569.hg.1	LOC100507205	8.24	0.00610588
TC05003145.hg.1	TC05003145.hg.1	8.23	0.0029656
TC0X001790.hg.1	TC0X001790.hg.1	8.2	0.0058589
TC01002777.hg.1	NEGR1	8.13	0.00625153
TC03001014.hg.1	LOC344887	8.13	0.00657947
TC09002008.hg.1	TC09002008.hg.1	8.11	0.00482587
TC06002332.hg.1	LOC105378147	8.09	0.00810632
TC6_cox_hap2000052.hg.1	MUC22	8.04	0.00950621
TC11002617.hg.1	TC11002617.hg.1	8.01	0.00910252
TC10001794.hg.1	FRG2B	8.01	0.00502624
TC02000662.hg.1	SULT1C3	8.01	0.00356578
TC07002848.hg.1	KIAA0087	8	0.00339069
TC06000354.hg.1	MUC22	8	0.00877875
TC01005609.hg.1	TC01005609.hg.1	7.94	0.0077952
TC02003127.hg.1	GTF3C2-AS1	7.92	0.00915061
TC21000820.hg.1	TC21000820.hg.1	7.9	0.00291741
TC05003346.hg.1	TC05003346.hg.1	7.83	0.00731003
TC04002366.hg.1	SORBS2	7.81	0.00818911
TC13000834.hg.1	CLYBL-AS2	7.81	0.00940726
TC09000065.hg.1	TYRP1	7.8	0.00829302
TC14001165.hg.1	TC14001165.hg.1	7.78	0.00525542
TC12002562.hg.1	TC12002562.hg.1	7.77	0.00542227
TC06002378.hg.1	HLA-A	7.76	0.00769007
TC06002331.hg.1	TC06002331.hg.1	7.73	0.00373416
TC11001096.hg.1	LOC102724301	7.73	0.00705821
TC20000133.hg.1	RIN2	7.7	0.00948564
TC10001274.hg.1	TC10001274.hg.1	7.68	0.00731275
TC11003128.hg.1	LOC100507205	7.67	0.00890858
TC08002011.hg.1	TC08002011.hg.1	7.67	0.00900905
TC04001206.hg.1	TC04001206.hg.1	7.66	0.00329236
TC14000702.hg.1	SNORD114-22	7.63	0.00863119
TC17002712.hg.1	TC17002712.hg.1	7.59	0.00194589
TC13001165.hg.1	LINC00347	7.58	0.00440576
TC10001268.hg.1	LRRC18	7.55	0.00667006
TC02003284.hg.1	TC02003284.hg.1	7.54	0.0037868
TC21000610.hg.1	TC21000610.hg.1	7.5	0.00666426
TC21000254.hg.1	TC21000254.hg.1	7.47	0.00281706
TC12002703.hg.1	TC12002703.hg.1	7.44	0.00593616
TC01003507.hg.1	LINC01142	7.4	0.00827236
TC6_qbl_hap6000045.hg.1	MUC22	7.39	0.00670669
TC12000351.hg.1	C12orf54	7.38	0.00437892
TC17000280.hg.1	TC17000280.hg.1	7.32	0.00988602
TC01002936.hg.1	LOC101928476	7.3	0.00812601
TC01000970.hg.1	TC01000970.hg.1	7.27	0.00817186
TC06003386.hg.1	TC06003386.hg.1	7.27	0.00767413
TC07001935.hg.1	TAS2R38	7.25	0.00558578
TC01002435.hg.1	LOC101928460	7.24	0.00809343
TC14000035.hg.1	OR4M1	7.23	0.00186871
TC13001409.hg.1	TC13001409.hg.1	7.23	0.00320605
TC09000754.hg.1	MED27	7.23	0.00452075
TC09000113.hg.1	TC09000113.hg.1	7.2	0.00588054
TC03002459.hg.1	TC03002459.hg.1	7.19	0.00767396
TC01004227.hg.1	TC01004227.hg.1	7.19	0.00407338
TC01005825.hg.1	TC01005825.hg.1	7.12	0.00617257
TC15001353.hg.1	TC15001353.hg.1	7.11	0.00793177
TC01005856.hg.1	TC01005856.hg.1	7.09	0.00864146
TC02000178.hg.1	C2orf16	7.08	0.00559354
TC04001645.hg.1	TC04001645.hg.1	7.07	0.00530112
TC16001919.hg.1	LOC101927650	7.04	0.00735366
TC02003596.hg.1	LOC101928161	6.97	0.00958081
TC19001894.hg.1	DUXA	6.96	0.00877672
TC05000781.hg.1	LOC101926975	6.92	0.00332088
TC22001386.hg.1	TC22001386.hg.1	6.91	0.00781243
TC02000654.hg.1	TC02000654.hg.1	6.9	0.00517319
TC08002037.hg.1	TC08002037.hg.1	6.89	0.00193614
TC01005681.hg.1	TC01005681.hg.1	6.85	0.00734823
TC12001048.hg.1	TC12001048.hg.1	6.8	0.00491769
TC08001918.hg.1	TC08001918.hg.1	6.79	0.00974437
TC10000064.hg.1	TC10000064.hg.1	6.78	0.00792622
TC02004458.hg.1	TC02004458.hg.1	6.77	0.00734271
TC06000033.hg.1	TC06000033.hg.1	6.77	0.00827443
TC0X001184.hg.1	HMGN5	6.72	0.00986091
TC09002129.hg.1	TC09002129.hg.1	6.72	0.00802139
TC01004847.hg.1	TC01004847.hg.1	6.72	0.00906552
TC06003256.hg.1	TC06003256.hg.1	6.71	0.00327074
TC11002666.hg.1	TC11002666.hg.1	6.7	0.00964635
TC04002227.hg.1	TC04002227.hg.1	6.69	0.00515728
TC17000206.hg.1	TC17000206.hg.1	6.69	0.00528759
TC20001107.hg.1	TC20001107.hg.1	6.64	0.00878973
TC06001792.hg.1	DEFB110	6.63	0.00673021
TC04002477.hg.1	TC04002477.hg.1	6.62	0.00805901
TC04000428.hg.1	MIR4450	6.61	0.0022712
TC10000626.hg.1	LIPJ	6.6	0.00750617
TC13000399.hg.1	TC13000399.hg.1	6.59	0.00408677
TC09002066.hg.1	TC09002066.hg.1	6.59	0.0092458
TC18000959.hg.1	TC18000959.hg.1	6.58	0.00688661
TC07002183.hg.1	TC07002183.hg.1	6.56	0.00375915
TC22000942.hg.1	TC22000942.hg.1	6.53	0.00923095
TC01002841.hg.1	TC01002841.hg.1	6.53	0.00618822
TC21000682.hg.1	TC21000682.hg.1	6.52	0.00567258
TC12002290.hg.1	TC12002290.hg.1	6.48	0.00461301
TC12001851.hg.1	TC12001851.hg.1	6.48	0.00354285
TC01002201.hg.1	LOC102724659	6.47	0.00706083
TC20000778.hg.1	TC20000778.hg.1	6.45	0.00450737
TC01004828.hg.1	TC01004828.hg.1	6.44	0.00876052
TC09001867.hg.1	TC09001867.hg.1	6.44	0.00817611
TC08002075.hg.1	DEPTOR	6.43	0.00536064
TC08001376.hg.1	TC08001376.hg.1	6.43	0.0019425
TC17002505.hg.1	TC17002505.hg.1	6.43	0.00711903
TC11001200.hg.1	TC11001200.hg.1	6.43	0.00686353
TC04001764.hg.1	TC04001764.hg.1	6.4	0.00442799
TC18000963.hg.1	TC18000963.hg.1	6.39	0.00305817
TC08000242.hg.1	TC08000242.hg.1	6.38	0.00864036
TC02003976.hg.1	TC02003976.hg.1	6.37	0.00202439
TC13000928.hg.1	TC13000928.hg.1	6.34	0.00382125
TC01002404.hg.1	TC01002404.hg.1	6.32	0.00797614
TC10001799.hg.1	TC10001799.hg.1	6.32	0.00844551
TC15001070.hg.1	NDN	6.31	0.0070215
TC22000197.hg.1	RFPL1	6.27	0.00838193
TC06000664.hg.1	TC06000664.hg.1	6.27	0.00610571
TC02003750.hg.1	TC02003750.hg.1	6.26	0.00972166
TC02003743.hg.1	COL3A1	6.25	0.00751254
TC12003196.hg.1	TC12003196.hg.1	6.24	0.00676983
TC06002029.hg.1	TC06002029.hg.1	6.24	0.00393883
TC06003461.hg.1	TC06003461.hg.1	6.23	0.0069774
TC04002775.hg.1	TC04002775.hg.1	6.22	0.00537635
TC14000749.hg.1	MIR382	6.17	0.00303172
TC15001602.hg.1	TC15001602.hg.1	6.17	0.00576873
TC05000034.hg.1	TC05000034.hg.1	6.17	0.00825992
TC0X001594.hg.1	TC0X001594.hg.1	6.15	0.00229358
TC04002128.hg.1	TC04002128.hg.1	6.15	0.00789139
TC03000409.hg.1	TC03000409.hg.1	6.13	0.00618313
TC12000194.hg.1	TC12000194.hg.1	6.1	0.00298826
TC04000358.hg.1	TC04000358.hg.1	6.08	0.0075108
TC06000126.hg.1	ID4	6.06	0.00932734
TC03001342.hg.1	TC03001342.hg.1	6.03	0.00781486
TC15002446.hg.1	TC15002446.hg.1	6.01	0.0088286
TC01004609.hg.1	TC01004609.hg.1	6.01	0.00497293
TC03002291.hg.1	TC03002291.hg.1	6	0.00523413
TC01002685.hg.1	RP5-997D24.5	5.98	0.00227957
TC10001051.hg.1	BEND7	5.98	0.00497182
TC14001593.hg.1	C14orf93	5.98	0.00581829
TC02003826.hg.1	TC02003826.hg.1	5.98	0.00856403
TC12000146.hg.1	TC12000146.hg.1	5.97	0.00630921
TC01000012.hg.1	TC01000012.hg.1	5.97	0.00740389
TC09000203.hg.1	CCIN	5.94	0.00760572
TC06000767.hg.1	TC06000767.hg.1	5.94	0.0052008
TC06000311.hg.1	TC06000311.hg.1	5.9	0.00535031
TC6_cox_hap2000008.hg.1	TC6_cox_hap2000008.hg.1	5.9	0.00535031
TC05000588.hg.1	TC05000588.hg.1	5.88	0.00494584
TC13001598.hg.1	TC13001598.hg.1	5.86	0.00485289
TC04002554.hg.1	TC04002554.hg.1	5.84	0.00652304
TC11002880.hg.1	LOC105369507	5.82	0.00736244
TC14000735.hg.1	MIR654	5.8	0.00585277
TC21000974.hg.1	TC21000974.hg.1	5.79	0.00359115
TC01001470.hg.1	LINC00626	5.77	0.00809563
TC12001362.hg.1	LOC101929027	5.71	0.00774039
TC07001785.hg.1	TC07001785.hg.1	5.69	0.00986777
TC06000790.hg.1	AKIRIN2	5.69	0.00542845
TC15002648.hg.1	ANKRD34C-AS1	5.68	0.00762765
TC15002229.hg.1	TC15002229.hg.1	5.66	0.007845
TC05002556.hg.1	TC05002556.hg.1	5.64	0.00545716
TC12002333.hg.1	TC12002333.hg.1	5.64	0.00377731
TC04002127.hg.1	TC04002127.hg.1	5.62	0.00564134
TC02000645.hg.1	TC02000645.hg.1	5.61	0.00828798
TC17000028.hg.1	OR1A2	5.6	0.0048582
TC05002029.hg.1	LOC101927908	5.6	0.00596226
TC10002176.hg.1	TC10002176.hg.1	5.57	0.00435381
TC07000124.hg.1	LOC101927769	5.56	0.00980567
TC08000922.hg.1	DEFB104B; DEFB104A	5.55	0.00618452
TC13000538.hg.1	TC13000538.hg.1	5.55	0.00849872
TC17002053.hg.1	LINC00670	5.53	0.00793364
TC15000556.hg.1	TC15000556.hg.1	5.52	0.00650197
TC19001951.hg.1	TC19001951.hg.1	5.5	0.00525497
TC01005547.hg.1	TC01005547.hg.1	5.48	0.00394922
TC06001788.hg.1	CRISP1	5.47	0.00883297
TC03000463.hg.1	HTR1F	5.46	0.00638512
TC01004669.hg.1	TC01004669.hg.1	5.46	0.00653705
TC06001283.hg.1	TC06001283.hg.1	5.45	0.00518304
TC07002786.hg.1	TC07002786.hg.1	5.45	0.00530227
TC07000182.hg.1	TC07000182.hg.1	5.45	0.00816684
TC0X001880.hg.1	TC0X001880.hg.1	5.45	0.00846235
TC02002863.hg.1	TC02002863.hg.1	5.44	0.00851882
TC02003517.hg.1	TC02003517.hg.1	5.44	0.00544654
TC03001659.hg.1	LOC101929717	5.44	0.00946226
TC01003641.hg.1	TC01003641.hg.1	5.44	0.00906459
TC06002135.hg.1	TC06002135.hg.1	5.41	0.00487865
TC10002153.hg.1	TC10002153.hg.1	5.41	0.00674817
TC01005713.hg.1	TC01005713.hg.1	5.4	0.0085784
TC12002406.hg.1	TC12002406.hg.1	5.39	0.00463906
TC09002739.hg.1	TC09002739.hg.1	5.38	0.0054014
TC08000535.hg.1	TC08000535.hg.1	5.33	0.00797792
TC10002296.hg.1	TC10002296.hg.1	5.31	0.00905109
TC16001851.hg.1	LOC100507221	5.3	0.0033357
TC09000698.hg.1	TC09000698.hg.1	5.27	0.00901426
TC05002099.hg.1	TC05002099.hg.1	5.27	0.00513831
TC09002425.hg.1	LOC100288238	5.26	0.00821912
TC12003175.hg.1	TC12003175.hg.1	5.22	0.00863747
TC6_apd_hap1000005.hg.1	TC6_apd_hap1000005.hg.1	5.18	0.00975797
TC05003129.hg.1	TC05003129.hg.1	5.15	0.00835306
TC10002013.hg.1	TC10002013.hg.1	5.15	0.00647011
TC0X000656.hg.1	RP11-274K13.2	5.14	0.00936032
TC03000902.hg.1	TC03000902.hg.1	5.1	0.00939844
TC10001267.hg.1	TC10001267.hg.1	5.08	0.00877631
TC10000783.hg.1	GSTO2	5.07	0.00587951
TC04002664.hg.1	TC04002664.hg.1	5.01	0.00731719
TC05002835.hg.1	TC05002835.hg.1	5	0.00732726
TC15002729.hg.1	TC15002729.hg.1	5	0.00830333
TC02002692.hg.1	TC02002692.hg.1	4.99	0.00521076
TC14001002.hg.1	TC14001002.hg.1	4.99	0.00379928
TC06003774.hg.1	UFL1	4.97	0.00906086
TC06001043.hg.1	GJE1	4.94	0.00536454
TC10002482.hg.1	TC10002482.hg.1	4.94	0.00777565
TC05003168.hg.1	TC05003168.hg.1	4.93	0.00895929
TC21000546.hg.1	TC21000546.hg.1	4.92	0.0059105
TC15002746.hg.1	TC15002746.hg.1	4.91	0.00754276
TC02003778.hg.1	TC02003778.hg.1	4.91	0.00458253
TC06002679.hg.1	TC06002679.hg.1	4.89	0.00754371
TC02004176.hg.1	TC02004176.hg.1	4.89	0.00668483
TC22000400.hg.1	TC22000400.hg.1	4.86	0.00712259
TC03000777.hg.1	TC03000777.hg.1	4.84	0.00523873
TC10001967.hg.1	TC10001967.hg.1	4.83	0.00380372
TC12003045.hg.1	TC12003045.hg.1	4.77	0.00695323
TC10002477.hg.1	TC10002477.hg.1	4.76	0.00714542
TC01003379.hg.1	OR6K2	4.74	0.00515661
TC10002093.hg.1	TC10002093.hg.1	4.73	0.00484608
TC05000032.hg.1	TC05000032.hg.1	4.73	0.00809911
TC15002328.hg.1	TC15002328.hg.1	4.72	0.00986664
TC04002000.hg.1	TC04002000.hg.1	4.71	0.00794589
TC12003155.hg.1	TC12003155.hg.1	4.71	0.00977712
TC01000954.hg.1	TC01000954.hg.1	4.69	0.00764554
TC14000701.hg.1	SNORD114-21	4.68	0.00408641
TC05003215.hg.1	TC05003215.hg.1	4.68	0.00974253
TC01004626.hg.1	TC01004626.hg.1	4.68	0.0078548
TC15000389.hg.1	TC15000389.hg.1	4.67	0.00859178
TC05001710.hg.1	TC05001710.hg.1	4.66	0.00454226
TC11002465.hg.1	TC11002465.hg.1	4.66	0.00757645
TC12000972.hg.1	TC12000972.hg.1	4.64	0.00539186
TC14001691.hg.1	TC14001691.hg.1	4.64	0.00845262
TC04001775.hg.1	TC04001775.hg.1	4.64	0.00349104
TC03002728.hg.1	TC03002728.hg.1	4.62	0.00288626
TC09002734.hg.1	TC09002734.hg.1	4.58	0.00677545
TC07001320.hg.1	LINC01448	4.55	0.00836858
TC19001243.hg.1	OR7C1	4.55	0.00303878
TC05002878.hg.1	TC05002878.hg.1	4.5	0.00370352
TC06001883.hg.1	TC06001883.hg.1	4.49	0.00597214
TC14000257.hg.1	TC14000257.hg.1	4.47	0.00505405
TC01003902.hg.1	TC01003902.hg.1	4.47	0.00950682
TC15001415.hg.1	TC15001415.hg.1	4.46	0.00690523
TC12000477.hg.1	OR6C1	4.43	0.00255832
TC03001916.hg.1	TC03001916.hg.1	4.42	0.00804782
TC15000097.hg.1	SNORD115-27	4.41	0.00263972
TC01004496.hg.1	TC01004496.hg.1	4.37	0.00722554
TC01005893.hg.1	TC01005893.hg.1	4.34	0.00870214
TC02002719.hg.1	TC02002719.hg.1	4.33	0.00867401
TC11003125.hg.1	TC11003125.hg.1	4.32	0.00418114
TC05003230.hg.1	TC05003230.hg.1	4.3	0.00413873
TC13001376.hg.1	TC13001376.hg.1	4.3	0.00852706
TC13001463.hg.1	TC13001463.hg.1	4.28	0.00857943
TC09002492.hg.1	TC09002492.hg.1	4.27	0.00788557
TC13000327.hg.1	TC13000327.hg.1	4.26	0.00663248
TC04000246.hg.1	TC04000246.hg.1	4.25	0.00898304
TC08000899.hg.1	TC08000899.hg.1	4.24	0.00892768
TC05001659.hg.1	TC05001659.hg.1	4.23	0.0098369
TC13000011.hg.1	TC13000011.hg.1	4.23	0.0055173
TC13000888.hg.1	ATP11A-AS1	4.22	0.00900716
TC17002480.hg.1	TC17002480.hg.1	4.22	0.0093295
TC21000108.hg.1	KRTAP20-2	4.21	0.00374411
TC02002380.hg.1	TC02002380.hg.1	4.19	0.00398184
TC01005988.hg.1	TC01005988.hg.1	4.17	0.005057
TC16001212.hg.1	TC16001212.hg.1	4.16	0.00512593
TC6_dbb_hap3000086.hg.1	TC6_dbb_hap3000086.hg.1	4.14	0.00839874
TC6_mcf_hap5000078.hg.1	TC6_mcf_hap5000078.hg.1	4.14	0.00839874
TC04001694.hg.1	TC04001694.hg.1	4.11	0.0092961
TC08000954.hg.1	TC08000954.hg.1	4.1	0.00632705
TC15001551.hg.1	TC15001551.hg.1	4.09	0.00790627
TC09002736.hg.1	TC09002736.hg.1	4.07	0.00944404
TC13000755.hg.1	TC13000755.hg.1	4.03	0.00881601
TC13001206.hg.1	TC13001206.hg.1	4.01	0.00881251
TC02002032.hg.1	TC02002032.hg.1	3.97	0.00770106
TC11000909.hg.1	TC11000909.hg.1	3.95	0.0034001
TC13000075.hg.1	TC13000075.hg.1	3.95	0.0081087
TC09002435.hg.1	TC09002435.hg.1	3.92	0.00981373
TC08000523.hg.1	TC08000523.hg.1	3.91	0.00682769
TC18000750.hg.1	TC18000750.hg.1	3.87	0.00467492
TC21000109.hg.1	KRTAP20-3	3.87	0.00738908
TC03002671.hg.1	TC03002671.hg.1	3.85	0.00379564
TC19001954.hg.1	TC19001954.hg.1	3.82	0.00598537
TC07001788.hg.1	TC07001788.hg.1	3.81	0.00340321
TC06000487.hg.1	TC06000487.hg.1	3.79	0.00745958
TC21000172.hg.1	TC21000172.hg.1	3.77	0.00975077
TC12002847.hg.1	TC12002847.hg.1	3.75	0.00868097
TC02000688.hg.1	TC02000688.hg.1	3.73	0.00450158
TC01005902.hg.1	TC01005902.hg.1	3.7	0.0068416
TC14000038.hg.1	OR4K5	3.69	0.00897552
TC07002621.hg.1	TC07002621.hg.1	3.67	0.00921591
TC08002389.hg.1	TC08002389.hg.1	3.66	0.00355298
TC22000746.hg.1	TC22000746.hg.1	3.63	0.00282982
TC01004843.hg.1	TC01004843.hg.1	3.61	0.00676959
TC06003720.hg.1	TC06003720.hg.1	3.57	0.00969593
TC01000472.hg.1	MIR4255	3.5	0.00609272
TC09002449.hg.1	TC09002449.hg.1	3.48	0.00888198
TC01000642.hg.1	TC01000642.hg.1	3.44	0.0067178
TC11002476.hg.1	TC11002476.hg.1	3.44	0.00827843
TC16001592.hg.1	TC16001592.hg.1	3.4	0.00990088
TC22000770.hg.1	TC22000770.hg.1	3.4	0.00959031
TC14000551.hg.1	TC14000551.hg.1	3.35	0.0058387
TC01003760.hg.1	TC01003760.hg.1	3.32	0.0088315
TC07001831.hg.1	TC07001831.hg.1	3.28	0.00936081
TC07000122.hg.1	MACC1-AS1	3.23	0.00880521
TC01002403.hg.1	TC01002403.hg.1	3.21	0.00671869
TC02000202.hg.1	TC02000202.hg.1	3.16	0.00870604
TC07002174.hg.1	TC07002174.hg.1	3.15	0.00559754
TC06000444.hg.1	TC06000444.hg.1	3.12	0.00378995
TC03002714.hg.1	TC03002714.hg.1	3.12	0.0066953
TC14001392.hg.1	TC14001392.hg.1	3.11	0.00457659
TC09001512.hg.1	TC09001512.hg.1	3.11	0.00504068
TC11003111.hg.1	TC11003111.hg.1	3.1	0.00811788
TC01003361.hg.1	TC01003361.hg.1	3.07	0.00492086
TC01006122.hg.1	TC01006122.hg.1	3.05	0.00885376
TC09000494.hg.1	TC09000494.hg.1	3.04	0.00630062
TC0X000333.hg.1	TC0X000333.hg.1	3.03	0.00417409
TC09000446.hg.1	TC09000446.hg.1	3.01	0.00536285
TC04000976.hg.1	TC04000976.hg.1	3.01	0.00901037
TC19000315.hg.1	TC19000315.hg.1	2.95	0.00591642
TC01004643.hg.1	TC01004643.hg.1	2.94	0.0091345
TC02000759.hg.1	TC02000759.hg.1	2.93	0.0028659
TC10000382.hg.1	TC10000382.hg.1	2.93	0.00739816
TC01005957.hg.1	TC01005957.hg.1	2.92	0.00697722
TC04001133.hg.1	TC04001133.hg.1	2.9	0.0017048
TC07000761.hg.1	TC07000761.hg.1	2.88	0.00673056
TC01005961.hg.1	TC01005961.hg.1	2.87	0.00491575
TC06003046.hg.1	TC06003046.hg.1	2.87	0.00293156
TC08001608.hg.1	TC08001608.hg.1	2.8	0.00736239
TC01005485.hg.1	TC01005485.hg.1	2.8	0.00936438
TC04001786.hg.1	TC04001786.hg.1	2.78	0.00980322
TC09001030.hg.1	TC09001030.hg.1	2.76	0.0090602
TC15000893.hg.1	TC15000893.hg.1	2.69	0.0094243
TC15000538.hg.1	TC15000538.hg.1	2.62	0.00808334
TC04002018.hg.1	TC04002018.hg.1	2.56	0.00776152
TC18000010.hg.1	TC18000010.hg.1	2.4	0.00654251
TC16002013.hg.1	TC16002013.hg.1	2.25	0.00930853
TC15001514.hg.1	TC15001514.hg.1	1.99	0.00357959
TC02000604.hg.1	TC02000604.hg.1	1.92	0.00538203
TC0X000540.hg.1	MIR3978	1.81	0.00695149
TC03001967.hg.1	TC03001967.hg.1	1.79	0.00720597
TC0X000538.hg.1	TMEM164	1.69	0.0062098
TC09000563.hg.1	TC09000563.hg.1	1.41	0.00934521
TC0X001828.hg.1	TC0X001828.hg.1	1.29	0.00714481
TC01001739.hg.1	TC01001739.hg.1	1.14	0.00613657
TC14002234.hg.1	IGHD3-10	-0.9	0.00753135
TC16000275.hg.1	TC16000275.hg.1	-1.41	0.00956414
TC15000394.hg.1	MIR4712	-1.52	0.00495297
TC10002092.hg.1	ARID5B	-1.75	0.0095785
TC17001365.hg.1	TC17001365.hg.1	-1.78	0.00794691
TC06002110.hg.1	OR2A4	-2	0.0069655
TC15000512.hg.1	TC15000512.hg.1	-2.01	0.0068133
TC0X000427.hg.1	P2RY10	-2.05	0.0079433
TC08001180.hg.1	TC08001180.hg.1	-2.17	0.00823371
TC15001206.hg.1	MIR3942	-2.18	0.00855679
TC12001411.hg.1	TC12001411.hg.1	-2.19	0.0091153
TC02004658.hg.1	TC02004658.hg.1	-2.2	0.00999911
TC11000956.hg.1	BIRC3	-2.21	0.00837768
TC15002195.hg.1	GABPB1-AS1	-2.21	0.00890152
TC0X002160.hg.1	ZMAT1	-2.33	0.00396335
TC03002239.hg.1	TC03002239.hg.1	-2.39	0.00974453
TC06002713.hg.1	LTA	-2.49	0.00834459
TC22001360.hg.1	TC22001360.hg.1	-2.55	0.00836782
TC12002356.hg.1	TC12002356.hg.1	-2.57	0.00701737
TC22001410.hg.1	TC22001410.hg.1	-2.62	0.00866024
TC03000014.hg.1	TC03000014.hg.1	-2.62	0.00764588
TC12002844.hg.1	TC12002844.hg.1	-2.65	0.00590505
TC0X000546.hg.1	ALG13	-2.68	0.00924911
TC06002662.hg.1	ZNF391	-2.68	0.00782787
TC0X001835.hg.1	ALG13	-2.71	0.00834329
TC10002486.hg.1	TRDMT1	-2.73	0.00325801
TC03002456.hg.1	TC03002456.hg.1	-2.79	0.00673531
TC02000260.hg.1	EML4	-2.82	0.00696128
TC04000614.hg.1	LOC645513	-2.86	0.00842792
TC01005703.hg.1	TC01005703.hg.1	-2.91	0.00248689
TC19001369.hg.1	ZNF675	-2.97	0.00838455
TC13000214.hg.1	TC13000214.hg.1	-2.99	0.00682247
TC05002581.hg.1	TC05002581.hg.1	-3.02	0.00731541
TC01001839.hg.1	LOC101926980; RP11-504P24.4	-3.07	0.00603922
TC06002549.hg.1	TC06002549.hg.1	-3.08	0.00792168
TC06000819.hg.1	UFL1	-3.1	0.00830985
TC03002821.hg.1	TC03002821.hg.1	-3.12	0.00755328
TC14001718.hg.1	TC14001718.hg.1	-3.16	0.00735189
TC04002171.hg.1	LOC645513	-3.18	0.00789379
TC07000090.hg.1	PHF14	-3.3	0.00967059
TC01003663.hg.1	ZBTB41	-3.34	0.00565711
TC15002000.hg.1	LINS1	-3.38	0.00856504
TC03001686.hg.1	COX17	-3.4	0.00431893
TC10002600.hg.1	TC10002600.hg.1	-3.41	0.0074605
TC03000548.hg.1	DZIP3	-3.41	0.00758518
TC08002102.hg.1	TC08002102.hg.1	-3.42	0.00944761
TC01005947.hg.1	TC01005947.hg.1	-3.43	0.00514939
TC07002374.hg.1	TC07002374.hg.1	-3.44	0.00896761
TC17001055.hg.1	NUP88	-3.49	0.00824835
TC11003187.hg.1	SNHG1	-3.51	0.00910033
TC10001229.hg.1	TC10001229.hg.1	-3.53	0.00878791
TC11001384.hg.1	RIC3	-3.56	0.00897897
TC06001131.hg.1	TULP4	-3.58	0.00517489
TC16001228.hg.1	PDXDC2P	-3.59	0.00874669
TC07001192.hg.1	FAM126A	-3.63	0.0087566
TC0X001191.hg.1	CHM	-3.67	0.00918984
TC12001412.hg.1	PUS7L	-3.67	0.00327326
TC01006409.hg.1	C1orf220	-3.68	0.00956124
TC18000556.hg.1	KDSR	-3.69	0.00650674
TC03003046.hg.1	TC03003046.hg.1	-3.7	0.00184895
TC03001699.hg.1	IQCB1	-3.72	0.00699821
TC02001798.hg.1	PREPL	-3.72	0.00854456
TC10001667.hg.1	ZDHHC6	-3.72	0.00822792
TC03000756.hg.1	SLC25A36	-3.72	0.00973043
TC09000441.hg.1	SUSD3	-3.72	0.00572409
TC17002610.hg.1	TC17002610.hg.1	-3.75	0.00878926
TC16000788.hg.1	ERVK13-1	-3.76	0.00464918
TC07002693.hg.1	PAXIP1-AS2	-3.76	0.00627272
TC09000896.hg.1	RANBP6	-3.78	0.0061898
TC0X002040.hg.1	CASK	-3.79	0.0080451
TC04000332.hg.1	SRP72	-3.79	0.00782273
TC04000615.hg.1	TC04000615.hg.1	-3.8	0.00731479
TC12002523.hg.1	VEZT	-3.81	0.0090672
TC01001111.hg.1	PDIA3P1	-3.82	0.0094678
TC16001745.hg.1	ERVK13-1	-3.82	0.00894603
TC02000120.hg.1	TC02000120.hg.1	-3.83	0.00677949
TC02003739.hg.1	TC02003739.hg.1	-3.84	0.00482091
TC18000114.hg.1	TAF4B	-3.85	0.00384752
TC07000498.hg.1	PHTF2	-3.86	0.00518276
TC07001958.hg.1	TRBV7-3	-3.87	0.0080743
TC04000564.hg.1	CCDC109B	-3.93	0.00878481
TC02003774.hg.1	CTLA4	-3.94	0.0051102
TC04000006.hg.1	ZNF141	-3.95	0.00997177
TC03000043.hg.1	TC03000043.hg.1	-3.95	0.00935102
TCUn_gl000223000005.hg.1	ZNF26	-3.96	0.00843026
TC19002039.hg.1	TC19002039.hg.1	-3.96	0.00554247
TC13001569.hg.1	DIS3	-3.97	0.00740457
TC11003057.hg.1	CSNK2A3	-4	0.00966309
TC08001011.hg.1	CNOT7	-4.03	0.00595609
TC0X001870.hg.1	TC0X001870.hg.1	-4.04	0.00594742
TC01005077.hg.1	ZNF678	-4.05	0.00957396
TC06001765.hg.1	SUPT3H	-4.05	0.00898537
TC17002434.hg.1	YWHAE	-4.06	0.00742548
TC04002600.hg.1	TC04002600.hg.1	-4.06	0.00808881
TC01001629.hg.1	TC01001629.hg.1	-4.09	0.00695853
TC17000972.hg.1	YWHAE	-4.09	0.0071767
TC04000367.hg.1	GCOM2	-4.14	0.00912321
TC02003099.hg.1	TC02003099.hg.1	-4.15	0.00659177
TC19001467.hg.1	ZFP14	-4.15	0.00876249
TC06003663.hg.1	SUPT3H	-4.15	0.00697334
TC11002124.hg.1	CLNS1A	-4.16	0.00541835
TC06001053.hg.1	TC06001053.hg.1	-4.17	0.0056053
TC02001201.hg.1	CTLA4	-4.17	0.00879605
TC19001151.hg.1	ZNF562; ZNF812P	-4.21	0.00863108
TC0X000652.hg.1	DDX26B	-4.21	0.0093036
TC03002197.hg.1	SETMAR	-4.22	0.00796548
TC01002073.hg.1	TC01002073.hg.1	-4.25	0.00417341
TC0X001226.hg.1	ZMAT1	-4.26	0.00243999
TC06002261.hg.1	SRP72P2	-4.28	0.00569013
TC05001600.hg.1	TC05001600.hg.1	-4.28	0.00561626
TC17001227.hg.1	TC17001227.hg.1	-4.3	0.00790824
TC06002181.hg.1	HIVEP2	-4.3	0.00875993
TC14001714.hg.1	DAAM1	-4.32	0.00717421
TC04000175.hg.1	ZCCHC4	-4.33	0.00802943
TC04000512.hg.1	METAP1	-4.38	0.00936175
TC07002162.hg.1	BZW2	-4.4	0.00513926
TC04000709.hg.1	ABCE1	-4.41	0.00544863
TC05002265.hg.1	MARCH6	-4.41	0.00254397
TC04001219.hg.1	AASDH	-4.42	0.00827164
TC13000358.hg.1	CLYBL	-4.43	0.00660841
TC01004312.hg.1	ZMYM1	-4.46	0.00702973
TC06000829.hg.1	TC06000829.hg.1	-4.49	0.00501107
TC15001205.hg.1	DPH6	-4.51	0.00458113
TC12001423.hg.1	LINC00938	-4.53	0.00920747
TC13000758.hg.1	RBM26	-4.55	0.00444574
TC02001194.hg.1	CARF	-4.56	0.00754005
TC19001398.hg.1	RPS4XP21	-4.59	0.00911064
TC07001124.hg.1	PMS2	-4.63	0.00912856
TC13000198.hg.1	SETDB2	-4.71	0.00518884
TC14000351.hg.1	KIAA0586	-4.73	0.00823507
TC04002922.hg.1	RASGEF1B	-4.76	0.00771069
TC10000673.hg.1	HELLS	-4.76	0.00988463
TC19001528.hg.1	ZNF780B	-4.79	0.00662733
TC07001454.hg.1	TC07001454.hg.1	-4.8	0.00866388
TC19001471.hg.1	ZNF529	-4.87	0.00763812
TC10001173.hg.1	CUL2	-4.88	0.00799565
TC02001069.hg.1	RBM45	-4.92	0.00672014
TC05001268.hg.1	LMBRD2	-4.95	0.00837404
TC08000577.hg.1	DPY19L4	-4.96	0.00873269
TC0X000098.hg.1	MBTPS2	-5.02	0.00662841
TC04001625.hg.1	PRMT9	-5.03	0.007315
TC02002813.hg.1	FARSB	-5.04	0.00311701
TC05001747.hg.1	C5orf63	-5.05	0.00619852
TC11002226.hg.1	TMEM123	-5.08	0.00627603
TC10002518.hg.1	LINC00614	-5.08	0.00346851
TC19002640.hg.1	ZNF223	-5.16	0.00952224
TC06002761.hg.1	TC06002761.hg.1	-5.17	0.0093191
TC15000393.hg.1	GABPB1-AS1	-5.22	0.00335881
TC11001419.hg.1	ZBED5	-5.22	0.00644785
TC12000991.hg.1	GTF2H3	-5.22	0.00361295
TC10001124.hg.1	ANKRD26	-5.24	0.00853105
TC14000310.hg.1	STYX	-5.27	0.0058882
TC19001798.hg.1	ZNF836	-5.33	0.0074154
TC09000613.hg.1	MRRF	-5.34	0.00862009
TC05001363.hg.1	PLPP1	-5.36	0.00767562
TC14000266.hg.1	FANCM	-5.36	0.00764183
TC04001278.hg.1	COX18	-5.37	0.00645538
TC03002437.hg.1	TC03002437.hg.1	-5.4	0.0039227
TC19002423.hg.1	TC19002423.hg.1	-5.42	0.00822885
TC02001439.hg.1	COPS8	-5.44	0.00653467
TC13000171.hg.1	GTF2F2	-5.46	0.00755368
TC01005058.hg.1	TC01005058.hg.1	-5.47	0.00625307
TC06001956.hg.1	NDUFAF4	-5.51	0.00489775
TC01004116.hg.1	FAM87B	-5.55	0.00789532
TC04001212.hg.1	CLOCK	-5.61	0.00739071
TC08002309.hg.1	RNF170	-5.62	0.00616014
TC03002771.hg.1	LMLN	-5.64	0.00516838
TC07001266.hg.1	RP9	-5.65	0.00770712
TC13000793.hg.1	TGDS	-5.67	0.00945335
TC01000456.hg.1	ZMYM4	-5.67	0.00708661
TC04002614.hg.1	THAP9-AS1	-5.71	0.00485649
TC01002870.hg.1	FAM69A	-5.72	0.00618
TC14000356.hg.1	DAAM1	-5.73	0.00918106
TC0X000087.hg.1	SCML1	-5.74	0.00854641
TC05001342.hg.1	MOCS2	-5.75	0.00502957
TC07000093.hg.1	TMEM106B	-5.76	0.00447742
TC10002525.hg.1	WAC-AS1	-5.76	0.0072154
TC05000354.hg.1	UTP15	-5.78	0.0061583
TC01001990.hg.1	COX20	-5.82	0.0052116
TC01003581.hg.1	TC01003581.hg.1	-5.87	0.00178022
TC10000613.hg.1	FAM35A	-5.88	0.00716085
TC04000549.hg.1	AIMP1	-5.88	0.00528387
TC04001927.hg.1	TC04001927.hg.1	-5.89	0.00568539
TC02000211.hg.1	SLC30A6	-5.93	0.00600827
TC04002405.hg.1	PDE6B	-5.99	0.00943064
TC19001913.hg.1	LOC105372482	-6.05	0.00465017
TC13000285.hg.1	UCHL3	-6.07	0.00300653
TC02000348.hg.1	REL	-6.1	0.00652807
TC06001762.hg.1	NFKBIE	-6.11	0.0071395
TC11002558.hg.1	ZBED5-AS1	-6.11	0.00713019
TC09001378.hg.1	ZNF510	-6.11	0.00798209
TC18000074.hg.1	RNMT	-6.18	0.00997579
TC05000056.hg.1	MTRR	-6.2	0.00515061
TC17002095.hg.1	TRIM16L	-6.23	0.0076533
TC01003124.hg.1	PRKAB2	-6.25	0.00881581
TC19001813.hg.1	ZNF347	-6.27	0.00799242
TC01000756.hg.1	HHLA3	-6.3	0.00624546
TC06000514.hg.1	PPARD	-6.3	0.00713122
TC0X000826.hg.1	PUDP	-6.39	0.00405882
TC19002601.hg.1	TC19002601.hg.1	-6.41	0.0029065
TC19000617.hg.1	ZNF225	-6.45	0.00620818
TC03000339.hg.1	GNL3; SNORD19B	-6.52	0.00896486
TC18000025.hg.1	LINC00667	-6.56	0.00186239
TC05003397.hg.1	IPO11; LRRC70	-6.61	0.00772014
TC16000352.hg.1	TC16000352.hg.1	-6.64	0.00376137
TC07002325.hg.1	TC07002325.hg.1	-6.64	0.00568888
TC11000257.hg.1	PRMT3	-6.64	0.00825129
TC12000837.hg.1	TC12000837.hg.1	-6.67	0.00574784
TC19002226.hg.1	ZNF331	-6.73	0.00393325
TC14001178.hg.1	TIMM9	-6.75	0.00754458
TC11001294.hg.1	ZNF195	-6.79	0.00695479
TC08000505.hg.1	PKIA	-6.8	0.00822474
TC19000388.hg.1	ZNF714	-6.81	0.00600677
TC02000061.hg.1	TC02000061.hg.1	-6.82	0.00526147
TC11003013.hg.1	ZNF195	-6.87	0.00404588
TC10000122.hg.1	PTER	-6.95	0.00448987
TC15000628.hg.1	FEM1B	-7.06	0.00967506
TC19001918.hg.1	ZNF132	-7.08	0.00966796
TC02002882.hg.1	USP40	-7.16	0.00295961
TC06000715.hg.1	FAM135A	-7.34	0.00921927
TC03001285.hg.1	EPM2AIP1	-7.34	0.00117434
TC01000842.hg.1	ZNF326	-7.46	0.00592917
TC13000120.hg.1	NBEA	-7.48	0.00712401
TC06001111.hg.1	TC06001111.hg.1	-7.52	0.00118284
TC01001871.hg.1	ZNF678	-7.65	0.00885933
TC07003318.hg.1	RBAK; RBAK-RBAKDN; RBAKDN	-7.69	0.00947464
TC21000480.hg.1	ZBTB21	-7.76	0.00642635
TC19000558.hg.1	ZNF546	-7.81	0.00896248
TC12001069.hg.1	ZNF140	-7.86	0.00894467
TC03000012.hg.1	SETMAR	-7.95	0.00921124
TC08000387.hg.1	CHCHD7	-7.96	0.00758675
TC08001667.hg.1	MIR30D	-8.24	0.00668012
TC18000383.hg.1	ZNF519	-8.47	0.00932849
TC0X001072.hg.1	FAM120C	-8.52	0.00940335
TC05003227.hg.1	LINC01184	-8.63	0.00746504
TC13001096.hg.1	INTS6-AS1	-8.84	0.00280546
TC02002377.hg.1	DARS	-8.94	0.00490393
TC16001489.hg.1	TC16001489.hg.1	-8.96	0.0054128
TC01001595.hg.1	RNF2	-9	0.00654104
TC15000232.hg.1	PGBD4	-9	0.00295259
TC02001962.hg.1	TC02001962.hg.1	-9.22	0.00518766
TC07000110.hg.1	BZW2	-9.36	0.0032821
TCUn_gl000223000004.hg.1	ZNF84	-9.38	0.00653299
TC01003044.hg.1	WARS2	-9.45	0.0032968
TC11000930.hg.1	LOC101929295	-9.57	0.00662671
TC09002324.hg.1	LINC00094	-9.62	0.00981401
TC07000692.hg.1	DUS4L	-9.69	0.00307767
TC21000288.hg.1	NRIP1	-9.78	0.00248916
TC01001526.hg.1	CACYBP	-10.22	0.0061317
TC05000299.hg.1	CENPH	-10.47	0.00686649
TC04000161.hg.1	PACRGL	-11.75	0.00964547
TC03001592.hg.1	DHFRL1	-11.93	0.00858792
TC07000329.hg.1	LANCL2	-12.53	0.00737953
TC01000638.hg.1	BTF3L4	-12.98	0.00391993
TC0X000616.hg.1	OCRL	-13.52	0.00341177
TC02001314.hg.1	WNT10A	-13.88	0.00691393
