# Supplementary material for: Transcriptomic analysis of elderly women with low muscle mass: association with immune system pathway
Source: Aging (Albany NY). 2021 Sep 7;13(17):20992–1008. doi: 10.18632/aging.203505 (PMC8457609; doi:10.18632/aging.203505)
Supplement: Supplementary Table 2 [file aging-13-203505-s003.xls]

## Sheet: Supplementary_Table_2
Supplementary Table 2. Differentially expressed transcript clusters.
Transcript_cluster	Transcripts	Genes	fold_changes	P.Value
TC06000097.hg.1	ENST00000420478; ENST00000537663; ENST00000488763; ENST00000471906; ENST00000423553; ENST00000544682; ENST00000537388; ENST00000488300	RNF182	2.60268	0.0014
TC15001514.hg.1	#N/A	#N/A	2.14355	0.0001
TC01001739.hg.1	#N/A	#N/A	2.05623	0.0012
TC0X001828.hg.1	ENST00000288381; ENST00000372068; ENST00000372072; ENST00000372073	TMEM164	1.81504	0.0013
TC15000024.hg.1	ENST00000632008; ENST00000602595	AC254944.1; AC026150.3	1.8025	0.0117
TC15000148.hg.1	ENST00000602595; ENST00000632008	AC026150.3; AC254944.1	1.8025	0.0117
TC15000207.hg.1	ENST00000632008; ENST00000602595	AC254944.1; AC026150.3	1.8025	0.0117
TC15000238.hg.1	ENST00000632008; ENST00000602595	AC254944.1; AC026150.3	1.8025	0.0117
TC15000243.hg.1	ENST00000632008; ENST00000602595	AC254944.1; AC026150.3	1.8025	0.0117
TC15001014.hg.1	ENST00000602595; ENST00000632008	AC026150.3; AC254944.1	1.8025	0.0117
TC15001053.hg.1	ENST00000602595; ENST00000632008	AC026150.3; AC254944.1	1.8025	0.0117
TC15001115.hg.1	ENST00000632008; ENST00000602595	AC254944.1; AC026150.3	1.8025	0.0117
TC15001129.hg.1	ENST00000602595; ENST00000632008	AC026150.3; AC254944.1	1.8025	0.0117
TC15001157.hg.1	ENST00000632008; ENST00000602595	AC254944.1; AC026150.3	1.8025	0.0117
TC15001673.hg.1	ENST00000602595; ENST00000632008	AC026150.3; AC254944.1	1.8025	0.0117
TC07000899.hg.1	ENST00000549489; ENST00000632195; ENST00000475668; ENST00000620571	MGAM	1.71713	0.031
TC01000232.hg.1	ENST00000375448; ENST00000628229	PADI4	1.70527	0.0201
TC20000662.hg.1	ENST00000384552	Y_RNA	1.68179	0.0082
TC02000604.hg.1	#N/A	#N/A	1.67018	0.0007
TC0M000008.hg.1	ENST00000361381; ENST00000387441; ENST00000387449; ENST00000387456; ENST00000361567	MT-ND4; MT-TH; MT-TS2; MT-TL2; MT-ND5	1.65864	0.0204
TC15001528.hg.1	ENST00000657134	AC126323.2	1.65864	0.0374
TC0X000538.hg.1	ENST00000288381; ENST00000372073; ENST00000372068	TMEM164	1.6358	0.001
TC0X000540.hg.1	ENST00000585195	MIR3978	1.6245	0.0011
TC10001500.hg.1	#N/A	#N/A	1.6245	0.0374
TC02002087.hg.1	ENST00000620585; ENST00000445057; ENST00000455995	AL669942.1; CR769776.2; FAM95B1	1.60214	0.0175
TC21000448.hg.1	ENST00000423089; ENST00000444977	SPATA20P1; AP001434.1	1.60214	0.0083
TC02001429.hg.1	#N/A	#N/A	1.59107	0.0134
TC0X000153.hg.1	#N/A	#N/A	1.59107	0.0195
TC12000051.hg.1	#N/A	#N/A	1.59107	0.0371
TC01004954.hg.1	#N/A	#N/A	1.58008	0.0141
TC02003914.hg.1	#N/A	#N/A	1.58008	0.0197
TC03001967.hg.1	ENST00000363182	Y_RNA	1.56917	0.0015
TC17002426.hg.1	ENST00000329099; ENST00000640199	RFLNB	1.56917	0.0081
TC04001133.hg.1	ENST00000517166	Y_RNA	1.55833	0.0001
TC09000563.hg.1	ENST00000363391	Y_RNA	1.53688	0.0031
TC10000128.hg.1	ENST00000515994	Y_RNA	1.53688	0.0208
TC04002067.hg.1	ENST00000307407	CXCL8	1.52626	0.0377
TC10001565.hg.1	ENST00000363867	Y_RNA	1.52626	0.0193
TC01001068.hg.1	ENST00000455995; ENST00000620585; ENST00000445057	FAM95B1; AL669942.1; CR769776.2	1.51572	0.0071
TC01003069.hg.1	ENST00000445057; ENST00000455995; ENST00000620585	CR769776.2; FAM95B1; AL669942.1	1.51572	0.0071
TC03002186.hg.1	ENST00000620585; ENST00000455995; ENST00000445057	AL669942.1; FAM95B1; CR769776.2	1.51572	0.0071
TC04000290.hg.1	ENST00000445057; ENST00000455995; ENST00000620585	CR769776.2; FAM95B1; AL669942.1	1.51572	0.0071
TC06001152.hg.1	ENST00000356956; ENST00000677704; ENST00000676781	IGF2R	1.51572	0.0169
TC09000146.hg.1	ENST00000455995; ENST00000620585; ENST00000445057	FAM95B1; AL669942.1; CR769776.2	1.51572	0.0071
TC09000300.hg.1	ENST00000455995; ENST00000445057; ENST00000620585	FAM95B1; CR769776.2; AL669942.1	1.51572	0.0071
TC09000408.hg.1	ENST00000455995; ENST00000445057; ENST00000620585	FAM95B1; CR769776.2; AL669942.1	1.51572	0.0071
TC09001120.hg.1	ENST00000445057; ENST00000455995; ENST00000620585	CR769776.2; FAM95B1; AL669942.1	1.51572	0.0071
TC09001147.hg.1	ENST00000455995; ENST00000445057; ENST00000620585	FAM95B1; CR769776.2; AL669942.1	1.51572	0.0071
TC09001304.hg.1	ENST00000620585; ENST00000445057; ENST00000455995	AL669942.1; CR769776.2; FAM95B1	1.51572	0.0071
TC0X000359.hg.1	ENST00000383919	Y_RNA	1.51572	0.0043
TC13000441.hg.1	ENST00000620585; ENST00000455995; ENST00000445057	AL669942.1; FAM95B1; CR769776.2	1.51572	0.0071
TC18000081.hg.1	ENST00000455995; ENST00000445057; ENST00000620585	FAM95B1; CR769776.2; AL669942.1	1.51572	0.0071
TC21000278.hg.1	ENST00000455995; ENST00000620585; ENST00000445057	FAM95B1; AL669942.1; CR769776.2	1.51572	0.0071
TC04001310.hg.1	#N/A	#N/A	1.50525	0.0226
TC09001898.hg.1	#N/A	#N/A	1.50525	0.0353
TC0X002258.hg.1	#N/A	#N/A	1.50525	0.0471
TC02004724.hg.1	ENST00000342992; ENST00000414766; ENST00000589042; ENST00000591111	TTN	0.664343	0.0398
TC08000087.hg.1	ENST00000645242; ENST00000259089; ENST00000529894; ENST00000646615	BLK; AC270286.1	0.664343	0.0281
TC15001998.hg.1	#N/A	#N/A	0.664343	0.0032
TC01004015.hg.1	ENST00000610890; ENST00000427859; ENST00000428176; ENST00000458325	CHRM3-AS2	0.659754	0.017
TC07000434.hg.1	ENST00000633479; ENST00000636308; ENST00000506558; ENST00000584900; ENST00000380410; ENST00000447708; ENST00000275546; ENST00000412694; ENST00000447046; ENST00000425039; ENST00000608621; ENST00000511313; ENST00000333674	AC237298.1; DTX2P1-UPK3BP1-PMS2P11; PMS2P7; PMS2P8; PMS2P10; AC211476.4; AC211486.3; AC004980.3; PMS2P2; POLR2J3; PMS2P6	0.659754	0.0321
TC07001523.hg.1	ENST00000636308; ENST00000584900; ENST00000633479; ENST00000511313; ENST00000506558; ENST00000380410; ENST00000447708; ENST00000275546; ENST00000412694; ENST00000333674; ENST00000425039; ENST00000447046; ENST00000608621	DTX2P1-UPK3BP1-PMS2P11; AC237298.1; POLR2J3; PMS2P7; PMS2P8; PMS2P10; AC211476.4; AC211486.3; PMS2P6; PMS2P2; AC004980.3	0.659754	0.0321
TC09002783.hg.1	ENST00000360998; ENST00000447404; ENST00000407982; ENST00000348403	STRBP	0.659754	0.0065
TC10001007.hg.1	ENST00000256876; ENST00000379959; ENST00000379954	IL2RA	0.659754	0.0062
TC10002610.hg.1	#N/A	#N/A	0.659754	0.0041
TC16001411.hg.1	ENST00000636238; ENST00000571190; ENST00000571186	CIITA	0.659754	0.0257
TC17001566.hg.1	ENST00000603850; ENST00000633630; ENST00000621298; ENST00000284414; ENST00000584928; ENST00000575554; ENST00000448648; ENST00000574795	LRRC37A9P; AC007993.1; LRRC37A6P; AC061975.5	0.659754	0.0197
TC03001052.hg.1	ENST00000392456; ENST00000392455	CCDC50	0.655197	0.0184
TC09001072.hg.1	ENST00000358127; ENST00000377852	PAX5	0.655197	0.0395
TC15002209.hg.1	#N/A	#N/A	0.655197	0.0196
TC19001901.hg.1	ENST00000451275; ENST00000512439	ZNF154	0.655197	0.0342
TC03002937.hg.1	#N/A	#N/A	0.650671	0.0258
TC11000175.hg.1	ENST00000318950; ENST00000447399	SWAP70	0.650671	0.0131
TC15000672.hg.1	ENST00000341853; ENST00000616104; ENST00000567850; ENST00000565702; ENST00000564895; ENST00000565222; ENST00000561042; ENST00000567292; ENST00000566124; ENST00000415963; ENST00000565767; ENST00000633652; ENST00000615639; ENST00000631636; ENST00000425045; ENST00000559110	DNM1P46; AC019322.3; DNM1P34; DNM1P28; DNM1P49; DNM1P33; DNM1P32; DNM1P50; DNM1P5	0.650671	0.0305
TC17001792.hg.1	ENST00000392795; ENST00000006750; ENST00000349817	CD79B	0.650671	0.0374
TC04000362.hg.1	ENST00000396225; ENST00000265404	STAP1	0.646176	0.0032
TC06002353.hg.1	ENST00000495137; ENST00000380956; ENST00000493114	IRF4	0.646176	0.0106
TC14001228.hg.1	ENST00000553754	AL355076.2	0.646176	0.0302
TC15001041.hg.1	ENST00000672926; ENST00000604066; ENST00000672738; ENST00000630556; ENST00000673017; ENST00000673613	AC270156.2; IGHV1OR15-1; AC135068.9; AC255360.1	0.646176	0.041
TC11000956.hg.1	ENST00000527309; ENST00000263464; ENST00000673846; ENST00000526421; ENST00000615299; ENST00000532808	BIRC3	0.641713	0.0012
TC14001478.hg.1	ENST00000554119; ENST00000554012; ENST00000556156; ENST00000557043; ENST00000402399; ENST00000556450; ENST00000555886	TCL1A	0.641713	0.0466
TC17001393.hg.1	#N/A	#N/A	0.641713	0.0238
TC01005751.hg.1	ENST00000650638	NOTCH2	0.63728	0.0173
TC13000829.hg.1	ENST00000376414	GPR183	0.63728	0.0061
TC22000567.hg.1	ENST00000248948; ENST00000398465	VPREB3	0.63728	0.016
TC01005699.hg.1	ENST00000566942	AL365361.1	0.632878	0.0043
TC02002136.hg.1	ENST00000409579; ENST00000317233; ENST00000409236; ENST00000672756	AFF3	0.632878	0.0209
TC06001946.hg.1	ENST00000257749	BACH2	0.632878	0.0032
TC08001801.hg.1	ENST00000645242; ENST00000259089; ENST00000529894; ENST00000646615; ENST00000643033	BLK; AC270286.1	0.632878	0.0238
TC11003270.hg.1	ENST00000534141; ENST00000612684; ENST00000533486; ENST00000527633	RAB30	0.632878	0.0197
TC16000280.hg.1	#N/A	#N/A	0.632878	0.0033
TC02004258.hg.1	ENST00000645224	BCL11A	0.628507	0.0251
TC17002019.hg.1	#N/A	#N/A	0.628507	0.0324
TC17001757.hg.1	ENST00000184956; ENST00000587003; ENST00000583979	HEATR6; MIR4737	0.619854	0.0195
TC02001886.hg.1	ENST00000645224	BCL11A	0.615572	0.0203
TC07002955.hg.1	#N/A	#N/A	0.615572	0.0109
TC08001180.hg.1	ENST00000522190	AC090739.1	0.615572	0.0007
TC10001555.hg.1	ENST00000371176; ENST00000224337	BLNK	0.615572	0.0217
TC16000274.hg.1	#N/A	#N/A	0.615572	0.0095
TC01003767.hg.1	ENST00000367091; ENST00000442471; ENST00000463473	FCMR	0.61132	0.0117
TC01005703.hg.1	ENST00000564771	AL390195.2	0.607097	0
TC03001507.hg.1	#N/A	#N/A	0.607097	0.012
TC03001649.hg.1	ENST00000383680; ENST00000334529	BTLA	0.607097	0.0214
TC15000060.hg.1	ENST00000383894; ENST00000657237; ENST00000671491; ENST00000384408	SNORD116-14; SNHG14; SNORD116-13	0.607097	0.0359
TC16000277.hg.1	#N/A	#N/A	0.607097	0.0042
TC16000278.hg.1	#N/A	#N/A	0.607097	0.0042
TC04000524.hg.1	ENST00000504592	BANK1	0.602904	0.0119
TC15000512.hg.1	#N/A	#N/A	0.602904	0.0006
TC17001466.hg.1	ENST00000246657; ENST00000579344; ENST00000578085	CCR7	0.602904	0.0133
TC05003326.hg.1	#N/A	#N/A	0.598739	0.0098
TC0X002160.hg.1	ENST00000540921; ENST00000494068; ENST00000490757; ENST00000372782; ENST00000458570; ENST00000488347; ENST00000651725	ZMAT1	0.598739	0.0002
TC12001370.hg.1	ENST00000535163	LINC02422	0.598739	0.0103
TC16000275.hg.1	#N/A	#N/A	0.598739	0.0022
TC07000918.hg.1	ENST00000422143; ENST00000634198	TRBV29-1	0.594604	0.0322
TC10002092.hg.1	ENST00000279873; ENST00000309334	ARID5B	0.594604	0.0014
TC01001544.hg.1	ENST00000367634; ENST00000367635	RALGPS2	0.586417	0.0302
TC18000952.hg.1	ENST00000589955	BCL2	0.578344	0.02
TC09002474.hg.1	ENST00000377840; ENST00000523241; ENST00000651199; ENST00000377853; ENST00000414447; ENST00000377847; ENST00000358127; ENST00000651550; ENST00000523145; ENST00000520154; ENST00000524340; ENST00000523493; ENST00000377852; ENST00000446742; ENST00000522003	PAX5	0.574349	0.0251
TC02004432.hg.1	#N/A	#N/A	0.570382	0.0111
TC14002143.hg.1	ENST00000556450; ENST00000557043; ENST00000402399; ENST00000554012; ENST00000554119; ENST00000553467; ENST00000556156; ENST00000555886	TCL1A	0.570382	0.0307
TC13001561.hg.1	ENST00000377861	PCDH9	0.562529	0.0467
TC15000394.hg.1	ENST00000583750; ENST00000499624	MIR4712; GABPB1-AS1	0.562529	0.0009
TC01003367.hg.1	ENST00000463001; ENST00000358292; ENST00000368175; ENST00000489998; ENST00000368176	FCRL1	0.524858	0.0251
TC02003403.hg.1	ENST00000627132; ENST00000390247; ENST00000421835; ENST00000443397; ENST00000633250	IGKV3D-7; IGKV3-7; IGKV3OR2-268	0.517632	0.0494
TC19002611.hg.1	ENST00000419549; ENST00000601769; ENST00000536635; ENST00000544992; ENST00000085219; ENST00000341773	CD22	0.514057	0.0101
TC02002962.hg.1	ENST00000628463; ENST00000630078; ENST00000412193	AC237191.2; AC244167.2; AC093642.1	0.493116	0.0111
TC02004912.hg.1	ENST00000412193	AC093642.1	0.482968	0.0052
TC16000296.hg.1	#N/A	#N/A	0.469761	0.0162
TC11000510.hg.1	ENST00000674194; ENST00000389939; ENST00000534668; ENST00000345732; ENST00000532073	MS4A1	0.466516	0.0178
TC19000588.hg.1	ENST00000221972; ENST00000597454; ENST00000444740	CD79A	0.460094	0.0109
TC02004396.hg.1	ENST00000390241; ENST00000483158; ENST00000390239; ENST00000632088; ENST00000390242	IGKJ2; IGKV3-11; IGKJ4; IGKJ1	0.45376	0.0095
TC14002213.hg.1	ENST00000637539; ENST00000626472; ENST00000390559	IGHM	0.447513	0.0219
TC14002214.hg.1	#N/A	#N/A	0.447513	0.0098
TC16000387.hg.1	ENST00000631425; ENST00000633350; ENST00000673017; ENST00000628927; ENST00000672926; ENST00000622028; ENST00000604066; ENST00000568138; ENST00000673613; ENST00000390594; ENST00000672738; ENST00000518307; ENST00000630556; ENST00000564926	IGHV1-12; IGHV1-2; AC255360.1; AC135068.10; AC270156.2; IGHV1OR21-1; IGHV1OR15-1; IGHV1OR16-3; AC135068.9; IGHV1OR15-3	0.444421	0.0356
TC14002234.hg.1	ENST00000390583; ENST00000632609	IGHD3-10	0.303549	0.0089
