# Supplementary material for: Transcriptomic analysis of elderly women with low muscle mass: association with immune system pathway
Source: Aging (Albany NY). 2021 Sep 7;13(17):20992–1008. doi: 10.18632/aging.203505 (PMC8457609; doi:10.18632/aging.203505)
Supplement: Supplementary Table 3 [file aging-13-203505-s004.xls]

## Sheet: Supplementary_Table_3
Supplementary Table 3. Classifiers identified by support vector machine.
Transcript_cluster	Transcript	Gene Symbol
TC01001739.hg.1
TC01002073.hg.1
TC01003663.hg.1	NM_194314; ENST00000367405; ENST00000467322; AK128549; BC132818; BC136600; OTTHUMT00000088249; OTTHUMT00000088250; uc001gtx.1; uc009wyz.1	ZBTB41
TC01003760.hg.1
TC01005703.hg.1
TC01005947.hg.1
TC02000604.hg.1
TC02000759.hg.1
TC03001686.hg.1	AK095366	COX17
TC03001967.hg.1
TC03002456.hg.1
TC03003046.hg.1
TC04000332.hg.1	NM_006947; ENST00000342756; ENST00000510663; AK023480; BX537991; OTTHUMT00000250782; OTTHUMT00000362149; OTTHUMT00000362151; OTTHUMT00000362152; OTTHUMT00000362155; uc003hbv.3; uc003hbx.3; uc010ihe.3	SRP72
TC04001133.hg.1
TC06001131.hg.1	ENST00000432358; OTTHUMT00000042868	TULP4
TC06003046.hg.1
TC08001180.hg.1
TC08001376.hg.1
TC08001608.hg.1
TC08002389.hg.1
TC0X000333.hg.1
TC0X000538.hg.1	NM_017698; NM_032227; ENST00000288381; ENST00000372068; ENST00000372072; ENST00000372073; ENST00000464177; AK026332; BC085605; OTTHUMT00000057896; OTTHUMT00000057898; OTTHUMT00000057899; OTTHUMT00000057900; OTTHUMT00000057901; OTTHUMT00000057902; uc004eom	TMEM164
TC0X000540.hg.1	NR_039774; uc022ccj.1	MIR3978
TC0X001226.hg.1	NM_001011657; NR_036431; NR_046008; NR_046009; ENST00000372782; ENST00000458570; ENST00000494068; ENST00000540921; AK094141; AK296520; BC140920; BC152470; OTTHUMT00000057598; OTTHUMT00000057599; OTTHUMT00000057600; OTTHUMT00000057601; uc004eim.3; uc004ein	ZMAT1
TC0X001828.hg.1
TC0X002160.hg.1	NR_036431	ZMAT1
TC10002092.hg.1	M73837	ARID5B
TC10002486.hg.1	AF329942; AF329943; AF329944	TRDMT1
TC11000909.hg.1
TC11000956.hg.1	NM_001165; NM_182962; ENST00000263464; ENST00000526421; ENST00000532808; BC037420; uc001pgx.3	BIRC3
TC12002844.hg.1
TC14000035.hg.1	NM_001005500; ENST00000315957; BC136987; uc010tku.2	OR4M1
TC14001392.hg.1
TC14002234.hg.1	OTTHUMT00000325960	IGHD3-10
TC15000097.hg.1	NR_003496; ENST00000364430; uc010ayq.1	SNORD115-27
TC15000232.hg.1	NM_152595; ENST00000397766; OTTHUMT00000251522; uc001zho.3	PGBD4
TC15000394.hg.1	NR_039862; uc021skw.1	MIR4712
TC15000512.hg.1
TC15001206.hg.1	NR_037507; uc021siz.1	MIR3942
TC15001514.hg.1
TC16000275.hg.1
TC17001365.hg.1
TC18000114.hg.1	NM_005640; ENST00000269142; ENST00000400466; ENST00000418698; AY888049; uc002kvs.4; uc002kvt.4; uc002kvu.4; Y09321	TAF4B
TC22000746.hg.1
TC22001410.hg.1
Empty cells = Without annotation
